# Supplementary material
Source: PubMed Central journal article supplement (PMC4158006)
Supplement: NIHMS606606-supplement-Supp1.pdf [file NIHMS606606-supplement-Supp1.pdf]

# A high content assay to identify small molecule modulators of a cancer stem cell population in luminal breast cancer

## Supplementary Material

Byong Hoon Yoo,<sup>1</sup> Sunshine Daddario Axlund,<sup>2</sup> Peter Kabos,<sup>4</sup> Brian G. Reid,<sup>1</sup> Jerome Schaack,<sup>3</sup> Carol A. Sartorius,<sup>2</sup> and Daniel V. LaBarbera<sup>1</sup>

<sup>1</sup>Department of Pharmaceutical Sciences, The Skaggs School of Pharmacy and Pharmaceutical Sciences; Departments of <sup>2</sup>Pathology, <sup>3</sup>Microbiology, and <sup>4</sup>Medical Oncology School of Medicine; The University of Colorado Denver Anschutz Medial Center, Aurora, CO, USA.

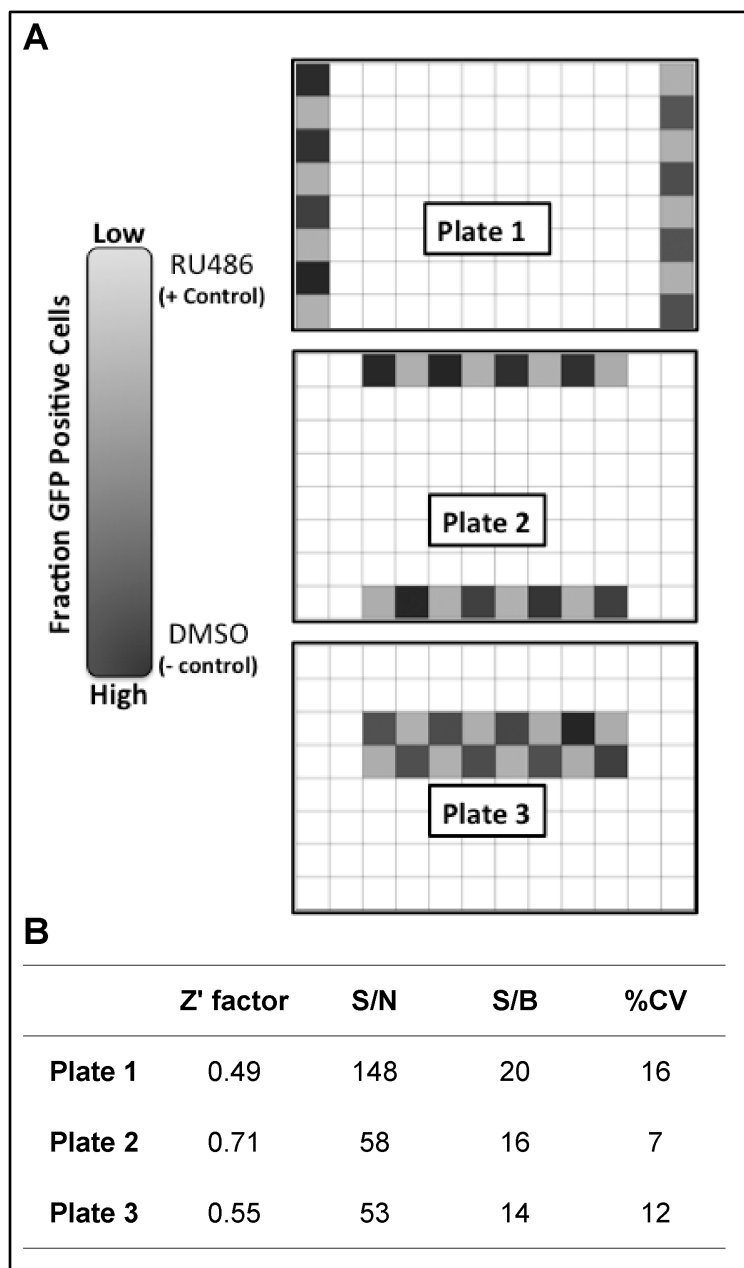

### Supplementary Figure S1.

#### High-content assay validation.

(A) Maps of 3 different 96-well plates for assay validation, including: 8 positive (1  $\mu$ M RU486) and 8 negative (0.5% DMSO) controls per plate. All control wells were treated with 100 nM progesterone. Plate maps were generated using the Operetta® imager and Harmony® software, and the scale bar next to the maps depicts the quantitative GFP intensity per well.

(B) Statistical parameters of assay validation including: signal to noise (S/N), signal to background (S/B), and % coefficient of variation (%CV).
